# Supplementary material for: Consistency of Hemoglobin A1c Testing and Cardiovascular Outcomes in Medicare Patients With Diabetes
Source: PubMed Central journal article supplement — J Am Heart Assoc. 2016 Aug 10;5(8):e003566. doi: 10.1161/JAHA.116.003566 (PMC5015285; doi:10.1161/jaha.116.003566), 2016-08-10
Supplement: JAH3-5-e003566-s001.pdf [file JAH3-5-e003566-s001.pdf]

# **SUPPLEMENTAL MATERIAL**

**Data S1:** ICD9 and CPT codes used to identify patients with diabetes, as well as major adverse cardiovascular outcomes in our analysis.

|                                                                  |                                                |  |
|------------------------------------------------------------------|------------------------------------------------|--|
|                                                                  |                                                |  |
| <b>Diabetes Diagnosis Codes:</b>                                 |                                                |  |
| 249.xx                                                           | Secondary diabetes mellitus                    |  |
| 250.xx                                                           | Diabetes mellitus                              |  |
|                                                                  |                                                |  |
| <b>Myocardial Infarction Diagnosis Codes:</b>                    |                                                |  |
| 410.xx: Acute myocardial infarction                              |                                                |  |
| 411.xx: Other acute and subacute forms of ischemic heart disease |                                                |  |
| 412.xx: Old myocardial infarction                                |                                                |  |
| 413.xx: Angina pectoris                                          |                                                |  |
| 414.xx: Other forms of chronic ischemic heart disease            |                                                |  |
|                                                                  |                                                |  |
| <b>Stroke Diagnosis Codes:</b>                                   |                                                |  |
| 433.00 to 433.91: occlusion/stenosis, precerebral artery         |                                                |  |
| 342 or 438: history of previous stroke                           |                                                |  |
| 435 or 781.4: transient ischemic attack                          |                                                |  |
| 362.34 or 368.12: amaurosis fugax                                |                                                |  |
| 997.0, 997.00, 997.01, and 997.09: In-hospital stroke.           |                                                |  |
|                                                                  |                                                |  |
| <b>Amputation Procedure Codes</b>                                |                                                |  |
| 27590                                                            | AMPUTATION THIGH THROUGH FEMUR ANY LEVEL       |  |
| 27591                                                            | AMP THI THRU FEMUR LVL IMMT FITG TQ W/1ST CST  |  |
| 27592                                                            | AMPUTATION THIGH THRU FEMUR OPEN CIRCULAR      |  |
| 27880                                                            | AMPUTATION LEG THROUGH TIBIA&FIBULA            |  |
| 27881                                                            | AMP LEG THRU TIBFIB W/IMMT FITG TQ W/1ST CST   |  |
| 27882                                                            | AMPUTATION LEG THRU TIBIA&FIBULA OPEN CIRCULAR |  |
|                                                                  |                                                |  |
| <b>Leg Vascular Procedure Codes</b>                              |                                                |  |
| 36200                                                            | INTRODUCTION CATHETER AORTA                    |  |
| 36245                                                            | SLCTV CATHJ EA 1ST ORD ABDL PEL/LXTR ART BRNCH |  |
| 36246                                                            | SLCTV CATHJ 2ND ORDER ABDL PEL/LXTR ART BRNCH  |  |
| 36247                                                            | SLCTV CATHJ 3RD+ ORD SLCTV ABDL PEL/LXTR       |  |

|       |                                                     |
|-------|-----------------------------------------------------|
|       | BRNCH                                               |
| 36248 | SLCTV CATHJ EA 2ND+ ORD ABDL PEL/LXTR<br>ART BRNCH  |
| 0238T | TRLUML PERIPHERAL ATHERECTOMY ILIAC<br>ARTERY EA    |
| 35452 | TRLUML BALLOON ANGIOPLASTY OPEN<br>AORTIC           |
| 35454 | TRLUML BALO ANGIOP OPN ILIAC                        |
| 35456 | TRLUML BALO ANGIOP OPN FEM-POP                      |
| 35459 | TRLUML BALO ANGIOP OPN TIBIOPRONEAL<br>TRNK&BRNCH   |
| 35470 | TRLUML BALO ANGIOP PRQ TIBPRNL<br>TRNK/BRNCH EA     |
| 35472 | TRLUML BALLOON ANGIOPLASTY<br>PERCUTANEOUS AORTIC   |
| 35473 | TRLUML BALO ANGIOP PRQ ILIAC                        |
| 35474 | TRLUML BALO ANGIOP PRQ FEMPOP                       |
| 35481 | TRLUML PRPH ATHRC OPN AORTIC                        |
| 35482 | TRLUML PRPH ATHRC OPN ILIAC                         |
| 35483 | TRLUML PRPH ATHRC OPN FEMPOP                        |
| 35485 | TRLUML PRPH ATHRC OPN TIBPRNL<br>TRNK&BRNCH         |
| 35491 | TRLUML PRPH ATHRC PRQ AORTIC                        |
| 35492 | TRLUML PRPH ATHRC PRQ ILIAC                         |
| 35493 | TRLUML PRPH ATHRC PRQ FEMPOP                        |
| 35495 | TRLUML PRPH ATHRC PRQ TIBPRNL<br>TRNK&BRNCH         |
| 37205 | TCAT PLMT IV STENT PERCUTANEOUS 1ST<br>VESSEL       |
| 37206 | TCAT PLMT IV STENT PERCUTANEOUS EACH<br>ADDL VESSEL |
| 37207 | TCAT PLMT IV STENT OPEN 1ST VESSEL                  |
| 37208 | TCAT PLMT IV STENT OPEN EACH ADDL VESSEL            |
| 37220 | REVASCULARIZATION ILIAC ARTERY ANGIOP<br>1ST VSL    |
| 37221 | REVSC OPN/PRQ ILIAC ART W/STNT PLMT &<br>ANGIOPLSTY |
| 37222 | REVASCULARIZATION ILIAC ART ANGIOP EA<br>IPSI VSL   |
| 37223 | REVSC OPN/PRQ ILIAC ART W/STNT & ANGIOP<br>IPSILATL |
| 37224 | REVSC OPN/PRG FEM/POP W/ANGIOPLASTY<br>UNI          |
| 37225 | REVSC OPN/PRQ FEM/POP W/ATHRC/ANGIOP<br>SM VSL      |
| 37226 | REVSC OPN/PRQ FEM/POP W/STNT/ANGIOP                 |

|       |                                                     |
|-------|-----------------------------------------------------|
|       | SM VSL                                              |
| 37227 | REVSC OPN/PRQ FEM/POP<br>W/STNT/ATHRC/ANGIOP SM VSL |
| 37228 | REVSC OPN/PRQ TIB/PERO W/ANGIOPLASTY<br>UNI         |
| 37229 | REVSC OPN/PRQ TIB/PERO W/ATHRC/ANGIOP<br>SM VSL     |
| 37230 | REVSC OPN/PRQ TIB/PERO W/STNT/ANGIOP<br>SM VSL      |
| 37231 | REVSC OPN/PRQ TIB/PERO<br>W/STNT/ATHR/ANGIOP SM VSL |
| 37232 | REVSC OPN/PRQ TIB/PERO W/ANGIOPLASTY<br>UNI EA VSL  |
| 37233 | REVSC OPN/PRQ TIB/PERO W/ATHRC/ANGIOP<br>UNI EA VSL |
| 37234 | REVSC OPN/PRQ TIB/PERO W/STNT/ANGIOP<br>UNI EA VSL  |
| 37235 | REVSC OPN/PRQ TIB/PERO<br>W/STNT/ATHR/ANGIOP EA VSL |
| 35302 | TEAEC W/GRAFT SUPERFICIAL FEMORAL<br>ARTERY         |
| 35303 | TEAEC W/GRAFT POPLITEAL ARTERY                      |
| 35304 | TEAEC W/GRAFT TIBIOPERONEAL TRUNK<br>ARTERY         |
| 35305 | TEAEC W/GRAFT TIBIAL/PERONEAL ART 1ST<br>VESSEL     |
| 35306 | TEAEC W/GRAFT EA ADDL TIBIAL/PERONEAL<br>ART        |
| 35351 | TEAEC W/WO PATCH GRAFT ILIAC                        |
| 35355 | TEAEC W/WO PATCH GRAFT ILIOFEMORAL                  |
| 35361 | TEAEC W/WO PATCH GRAFT COMBINED<br>AORTOILIAC       |
| 35363 | TEAEC W/WO PATCH GRAFT COMBINED<br>AORTOILIOFEMORAL |
| 35371 | TEAEC W/WO PATCH GRAFT COMMON<br>FEMORAL            |
| 35372 | TEAEC W/WO PATCH GRAFT DEEP PROFUNDA<br>FEMORAL     |
| 35521 | BYPASS W/VEIN AXILLARY-FEMORAL                      |
| 35533 | BYPASS W/VEIN AXILLARY-FEMORAL-<br>FEMORAL          |
| 35538 | BYPASS W/VEIN AORTOBI-ILIAC                         |
| 35539 | BYPASS W/VEIN AORTOFEMORAL                          |
| 35540 | BYPASS W/VEIN AORTOBIFEMORAL                        |
| 35541 | BYP W/VEIN AORTOILIAC/BI-ILIAC                      |
| 35546 | BYP W/VEIN AORTOFEM/BIFEM                           |

|       |                                                     |
|-------|-----------------------------------------------------|
| 35548 | BYP W/VEIN AORTOILIOFEM UNI                         |
| 35549 | BYP W/VEIN AORTOILIOFEM BI                          |
| 35551 | BYP W/VEIN AORTOFEMPOP                              |
| 35556 | BYPASS W/VEIN FEMORAL-POPLITEAL                     |
| 35558 | BYPASS W/VEIN FEMORAL-FEMORAL                       |
| 35563 | BYPASS W/VEIN ILIOILIAC                             |
| 35565 | BYPASS W/VEIN ILIOFEMORAL                           |
| 35566 | BYP FEM-ANT TIBL PST TIBL PRONEAL<br>ART/OTH DSTL   |
| 35571 | BYP W/VEIN POP-TIBL-PRONEAL ART/OTH<br>DSTL VSL     |
| 35583 | IN-SITU VEIN BYPASS FEMORAL-POPLITEAL               |
| 35585 | IN-SITU FEM-ANT TIBL PST TIBL/PRONEAL ART           |
| 35587 | IN-SITU VEIN BYP POP-TIBL PRONEAL                   |
| 35621 | BYP OTH/THN VEIN AXILLARY-FEMORAL                   |
| 35623 | BYP OTH/THN VEIN AXILLARY-POPLITEAL/-<br>TIBIAL     |
| 35637 | BYP OTH/THN VEIN AORTOILIAC                         |
| 35638 | BYP OTH/THN VEIN AORTOBI-ILIAC                      |
| 35646 | BYP OTH/THN VEIN AORTOBIFEMORAL                     |
| 35647 | BYP OTH/THN VEIN AORTOFEMORAL                       |
| 35651 | BYP OTH/THN VEIN AORTOFEMPOP                        |
| 35654 | BYP OTH/THN VEIN AXILLARY-FEMORAL-<br>FEMORAL       |
| 35656 | BYP OTH/THN VEIN FEMORAL-POPLITEAL                  |
| 35661 | BYP OTH/THN VEIN FEMORAL-FEMORAL                    |
| 35663 | BYP OTH/THN VEIN ILIOILIAC                          |
| 35665 | BYP OTH/THN VEIN ILIOFEMORAL                        |
| 35666 | BYP OTH/THN VEIN FEM-ANT TIBL PST<br>TIBL/PRONEAL   |
| 35671 | BYP OTH/THN VEIN POPLITEAL-TIBIAL/-<br>PERONEAL ART |
| 35681 | BYPASS COMPOSITE GRAFT PROSTHETIC &<br>VEIN         |
| 35682 | BYP AUTOG COMPOSIT 2 SEG VEINS FROM 2<br>LOCATIONS  |
| 35683 | BYP AUTOG COMPOSIT 3/> SEG FROM 2/><br>LOCATION     |
| 35879 | REVJ LXTR ARTL BYP OPN VEIN PATCH ANGIOP            |
| 35881 | REVJ LXTR ARTL BYP OPN W/SGMTL VEIN<br>INTERPOS     |
| 35883 | REVISION FEMORAL ANAST OPEN NONAUTOG<br>GRAFT       |
| 35884 | REVISION FEMORAL ANAST OPEN W/AUTOG<br>GRAFT        |
